# Supplementary material for: Characterization of Extended-Spectrum Cephalosporin (ESC) Resistance in Salmonella Isolated from Chicken and Identification of High Frequency Transfer of blaCMY-2 Gene Harboring Plasmid In Vitro and In Vivo
Source: MDPI journal article supplement (doi:10.3390/ani11061778), 2021-06-14
Supplement: s1 [file s1]

# Characterization of Extended-Spectrum Cephalosporin (ESC) Resistance in *Salmonella* Isolated from Chicken and Identification of High Frequency Transfer of *bla*<sub>CMY-2</sub> Gene Harboring Plasmid In Vitro and In Vivo

Bo-Ram Kwon, Bai Wei, Se-yeoun Cha, Ke Shang, Jun-Feng Zhang, Hyung-Kwan Jang and Min Kang

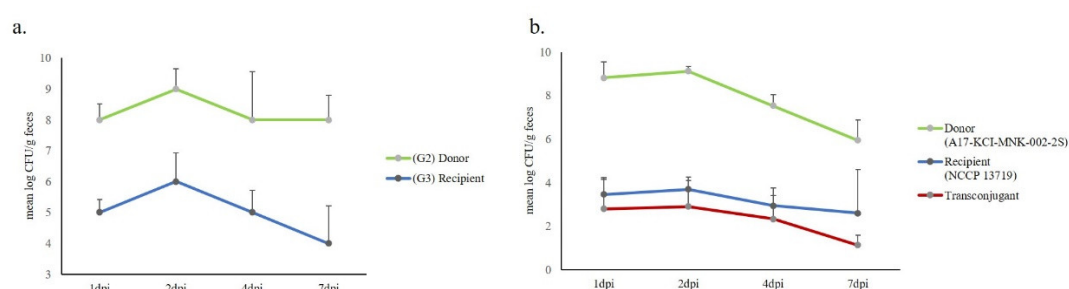

**Figure S1.** Fecal excretion of the donor in group 2 (G2) and the recipient in group 3 (G3) (a), the donor, re-recipient, and transconjugant in group 4 (G4) (inoculation of donor and recipient, simultaneously) (b), expressed as the log number of CFU per gram of feces.

**Table S1.** The list of pathogenic *Escherichia coli* isolates obtained from the National Culture Collection for Pathogen (NCCP) based in Korea.

| No. | NCCP no. | Pathogenic | Antimicrobial resistance | Conjugation |
|-----|----------|------------|--------------------------|-------------|
| 1   | 14039    | EAEC       | AMP/SXT/FIS/STR/TET      | b           |
| 2   | 15649    | EAEC       | AMP/SXT/FIS/CHL/STR/TET  | b           |
| 3   | 13719    | EIEC       | FIS/TET                  | a           |
| 4   | 15663    | EIEC       | SXT/FIS/STR              | b           |
| 5   | 15739    | EHEC       | AMP/STR/FIS              | b           |
| 6   | 15954    | EHEC       | AMP/STR/FIS              | b           |
| 7   | 15732    | ETEC       | Susceptible              | -*          |
| 8   | 15741    | ETEC       | Susceptible              | -           |
| 9   | 14038    | EPEC       | Susceptible              | -           |
| 10  | 15661    | EPEC       | Susceptible              | -           |

AMP, Ampicillin; SXT, Trimethoprim/sulfamethoxazole; FIS, sulfisoxazole; CHL, chloramphenicol; STR, streptomycin; TET, tetracycline.

a, Conjugation frequency (Transconjugant/recipient) with  $\geq 10^{-3}$ ; b, Conjugation frequency with  $< 10^{-7}$ .

\*Antimicrobial-susceptible isolates could not be used for conjugation experiment.
